# Supplementary figures and images for: Stable SET knockdown in head and neck squamous cell carcinoma promotes cell invasion and the mesenchymal-like phenotype in vitro, as well as necrosis, cisplatin sensitivity and lymph node metastasis in xenograft tumor models
Source: Springer Nature journal article supplement (doi:10.1186/1476-4598-13-32), 2014-02-20

**A**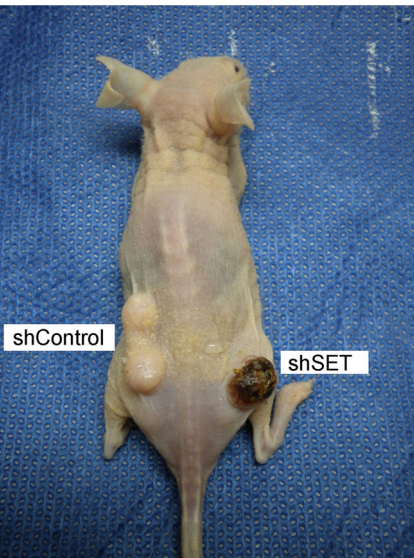**B**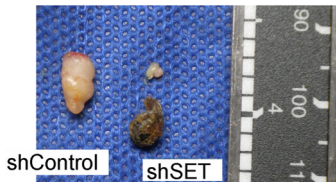

Supplement: 12943_2013_1252_MOESM10_ESM.pdf [file 12943_2013_1252_MOESM10_ESM.pdf]

A shControl

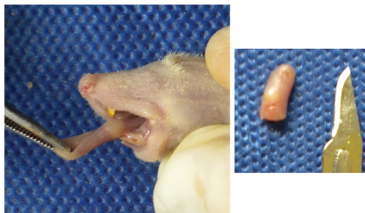

shSET

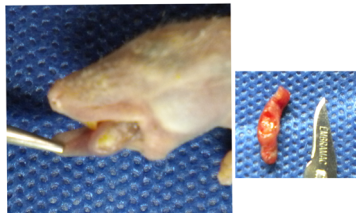

B

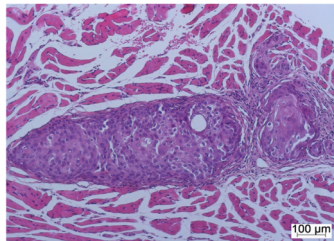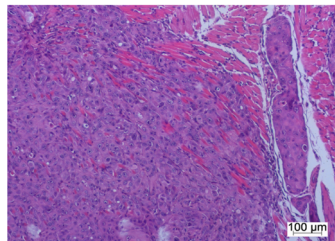

C

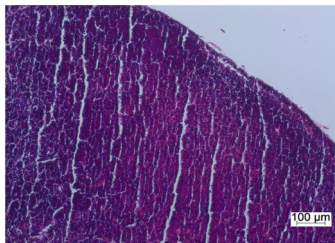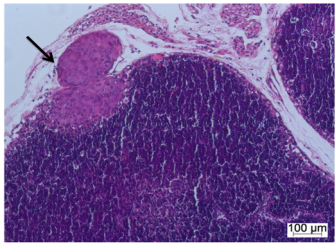

Supplement: 12943_2013_1252_MOESM11_ESM.pdf [file 12943_2013_1252_MOESM11_ESM.pdf]

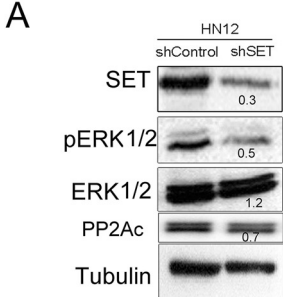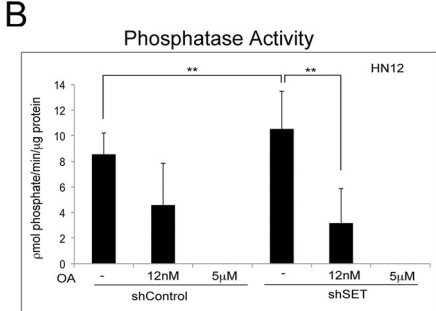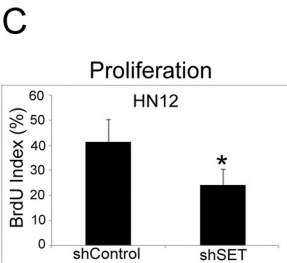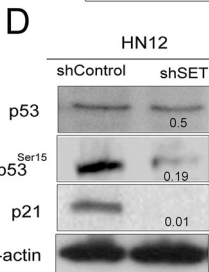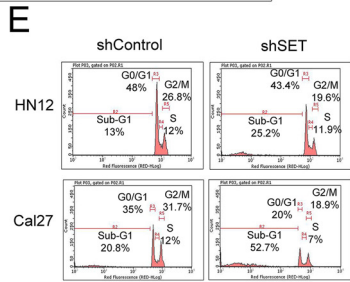

Supplement: 12943_2013_1252_MOESM4_ESM.pdf [file 12943_2013_1252_MOESM4_ESM.pdf]

**A**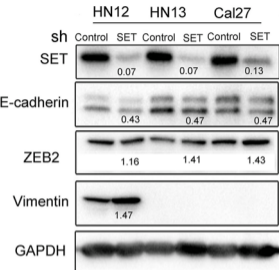**B**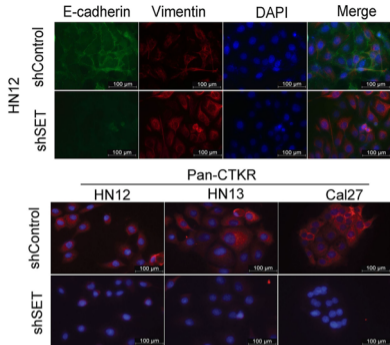**C**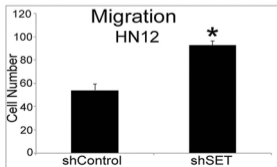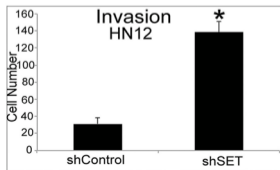

Supplement: 12943_2013_1252_MOESM5_ESM.pdf [file 12943_2013_1252_MOESM5_ESM.pdf]

**A**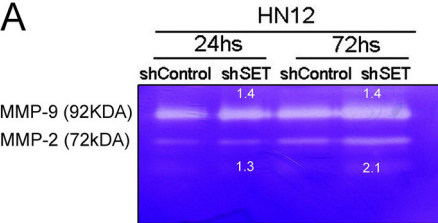**B**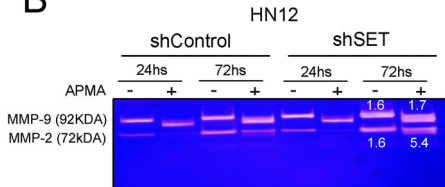**C**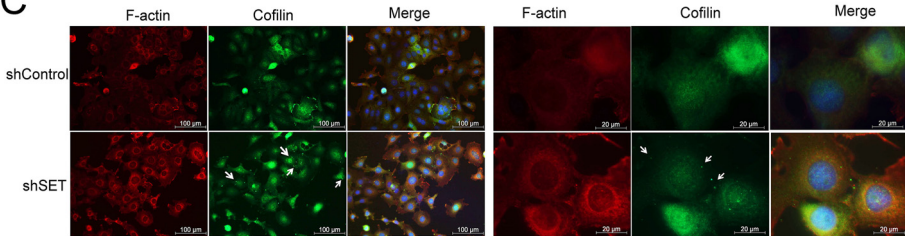

Supplement: 12943_2013_1252_MOESM6_ESM.pdf [file 12943_2013_1252_MOESM6_ESM.pdf]

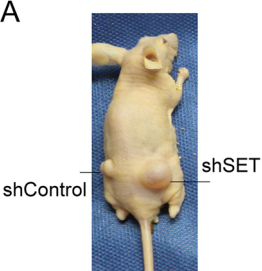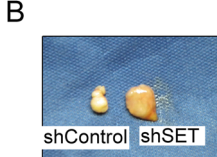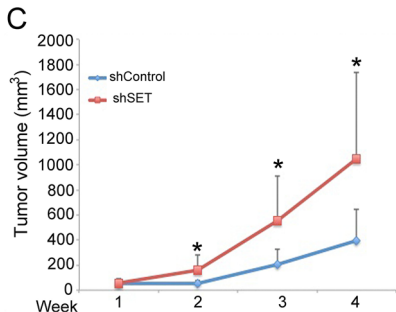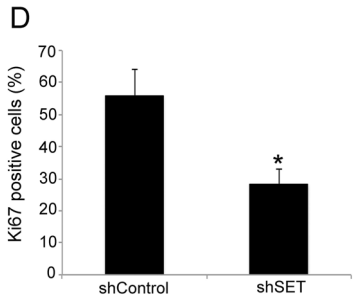

Supplement: 12943_2013_1252_MOESM7_ESM.pdf [file 12943_2013_1252_MOESM7_ESM.pdf]

**A**

shControl

shSET

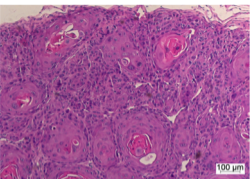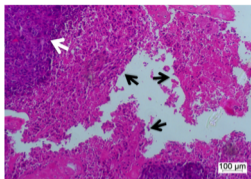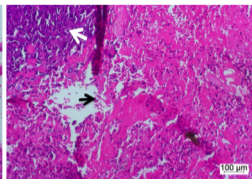**B**

shControl

shSET

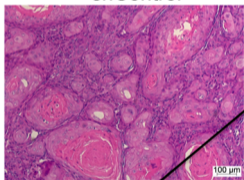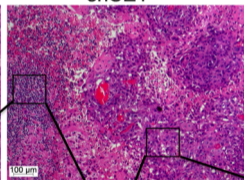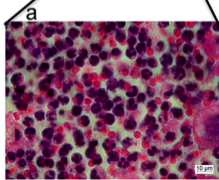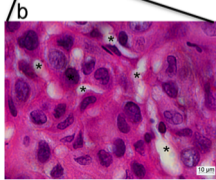

Supplement: 12943_2013_1252_MOESM8_ESM.pdf [file 12943_2013_1252_MOESM8_ESM.pdf]

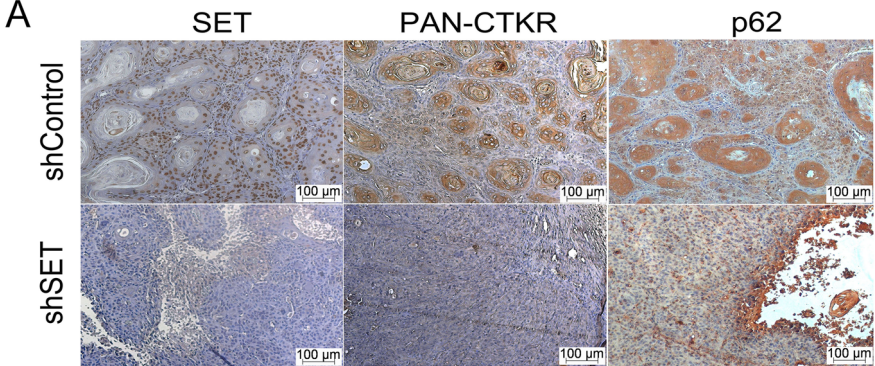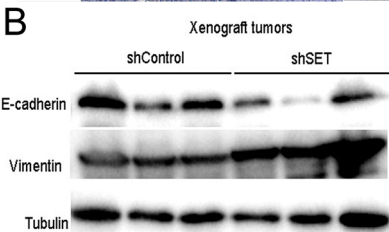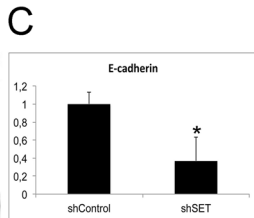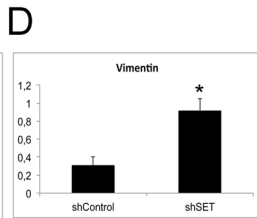

Supplement: 12943_2013_1252_MOESM9_ESM.pdf [file 12943_2013_1252_MOESM9_ESM.pdf]
